# Supplementary material
Source: PubMed Central journal article supplement (PMC3146769)
Supplement: NIHMS306765-supplement-1_si_001.pdf [file NIHMS306765-supplement-1_si_001.pdf]

**Supporting Information Available**

Effects of Biomolecular Flexibility on Alchemical Calculations of  
Absolute Binding Free Energies

Supplemental Material

Morgan Lawrenz, Riccardo Baron, Yi Wang, and J. Andrew McCammon

Supporting Figures

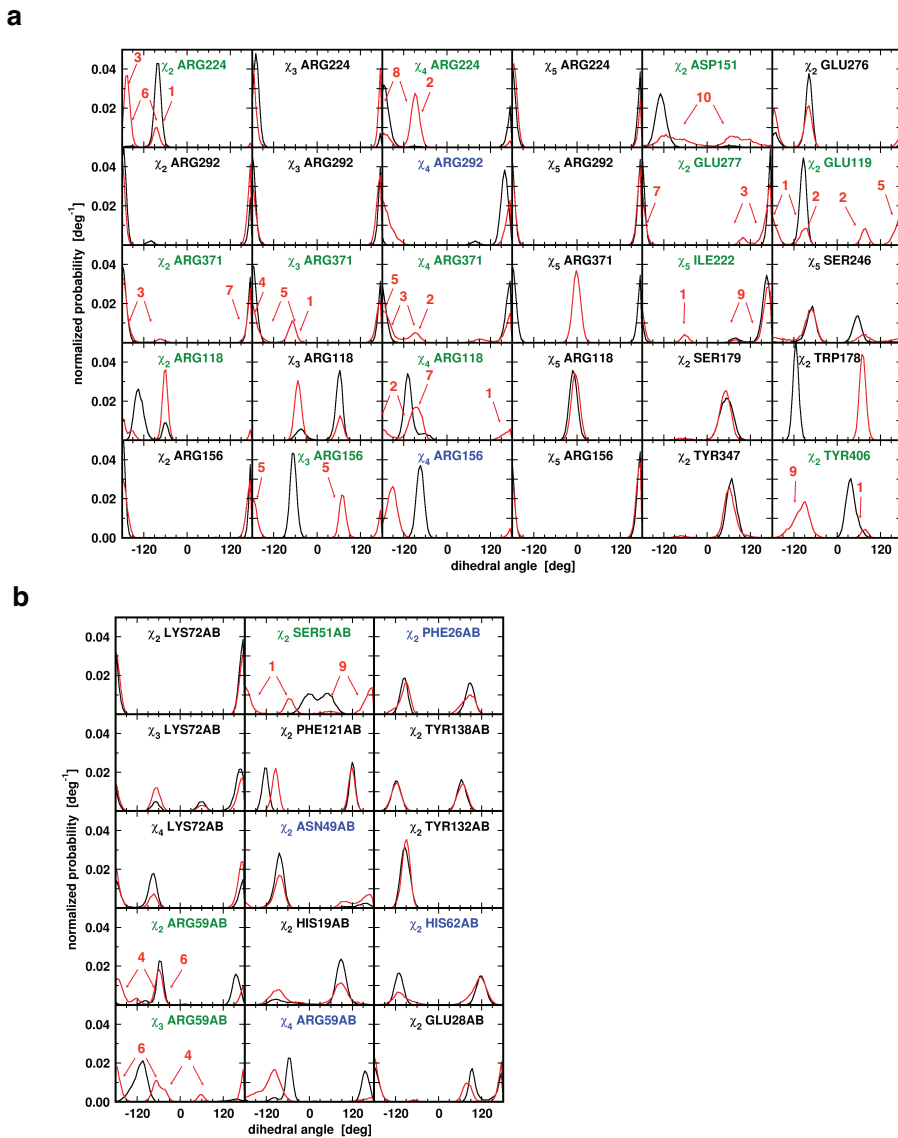

Figure S1: Analysis of torsional angle sampling for (a) N1 and (b) RmlC (both monomers A and B) active site residues during the TI calculations. Normalized probability distributions for the dihedrals monitored throughout all  $J = 10$  long simulations at  $\lambda = 0$  (black) and  $\lambda = 1$  (red) are shown. Green residue labels highlight increased flexibility, for residues with additional observed peaks when going from  $\lambda = 0$  to  $\lambda = 1$ . A new configuration is considered visited if the new peak represents at least 3% of the ensemble. For each  $\lambda = 1$  peak, the number of trajectories contributing is given. Blue residue labels indicate residues for which a significant ( $>20^\circ$ ) peak shift occurred at  $\lambda = 1$ .

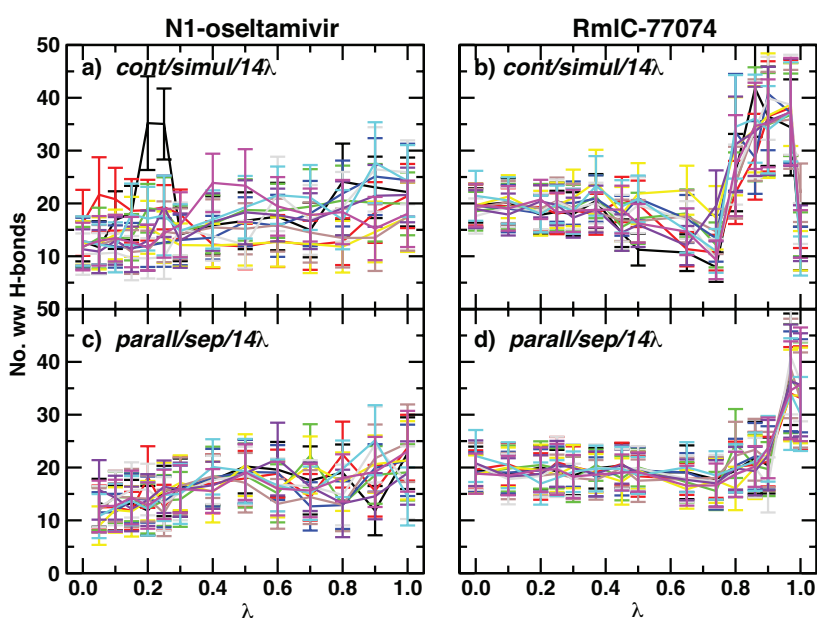

Figure S2: N1 and RmIC active site hydration behavior for varied IT-TI protocols. The average and standard deviation for water-water hydrogen bonds within a 5 Å radius around the ligand for N1 (a, c) and RmIC (b, d) is shown for the protocols labeled as in Table 1.

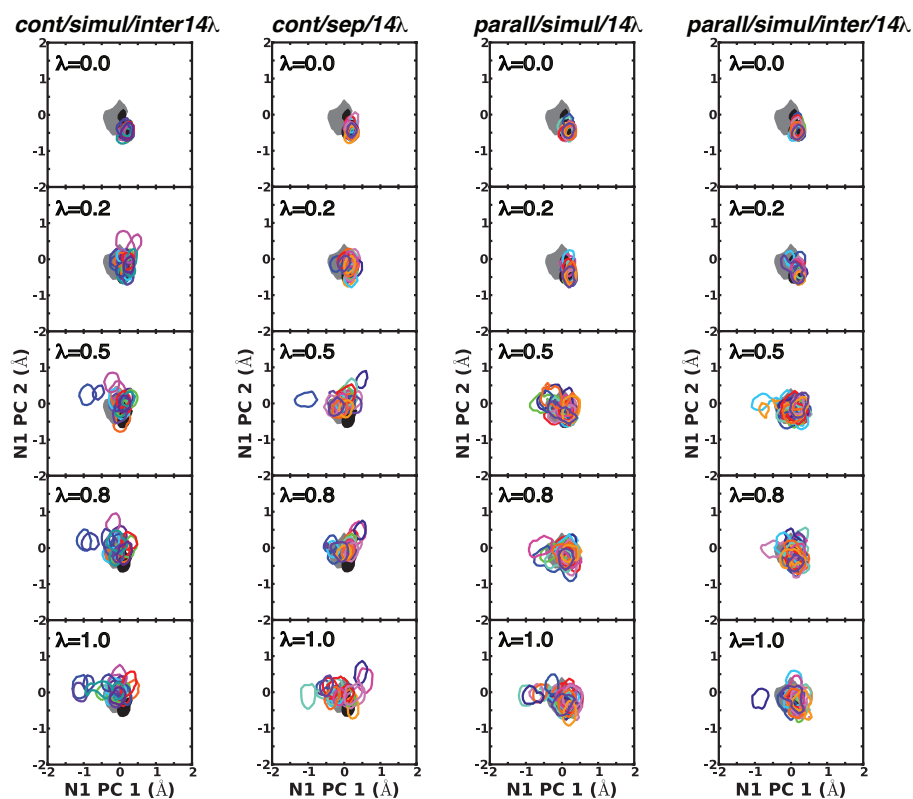

Figure S3: Receptor flexibility as captured by 2 dominant principal components (PC) of active site residue fluctuations from varied *medium* IT-TI protocols for N1. Protocols are labeled as in Table 1 and the free energy results are summarized in Table 2. See Figure 3 for color coding.
